# Supplementary material
Source: publisher figshare collection journal article supplement (https://sage.figshare.com/ndownloader/files/12981506)
Supplement: Supplementary file 1 [file 12981506]

## Supplemental Material

Table S1

### *Comparison between ASQ-CN and Western Structures*

| <i>ASQ-CN</i>                                                            | <i>Australian ASQ</i>             | <i>Norwegian ASQ</i>                | <i>European ASQ</i>               |
|--------------------------------------------------------------------------|-----------------------------------|-------------------------------------|-----------------------------------|
| <b>Stress of romantic relationships</b>                                  |                                   |                                     |                                   |
| Item 40: Not having enough time for your boy/girl-friend                 | Stress of romantic relationships  | Stress of romantic relationships    | Stress of romantic relationships  |
| Item 52: Getting along with your boy/girl-friend                         | Stress of romantic relationships  | Stress of romantic relationships    | Stress of romantic relationships  |
| Item 58: Breaking up with your boy/girl-friend                           | Stress of romantic relationships  | Stress of romantic relationships    | Stress of romantic relationships  |
| Item 27: Making the relationship with your boy/girl-friend work          | Stress of romantic relationships  | Stress of romantic relationships    | Stress of romantic relationships  |
| Item 41: Teachers hassling you about the way you look                    | Stress of teacher interaction     | Stress of teacher/adult interaction | Stress of teacher interaction     |
| <b>Stress of getting along with others</b>                               |                                   |                                     |                                   |
| Item 45: Not being listened to by teachers                               | Stress of teacher interaction     | Stress of teacher/adult interaction | Stress of teacher interaction     |
| Item 55: Lack of respect from teachers                                   | Stress of teacher interaction     | Stress of teacher/adult interaction | Stress of teacher interaction     |
| Item 44: Lack of trust from adults                                       | Stress of home life               | Stress of teacher/adult interaction | Stress of home life               |
| Item 53: Lack of freedom                                                 | Stress of school/leisure conflict | Stress of school/leisure conflict   | Stress of school/leisure conflict |
| Item 48: Lack of understanding by your parents                           | Stress of home life               | Stress of home life                 | Stress of home life               |
| Item 56: Disagreements between you and your peers                        | Stress of peer pressure           | Stress of peer pressure             | Stress of peer pressure           |
| Item 49: Parents hassling you about the way you look                     | Stress of home life               | Stress of teacher/adult interaction | Stress of home life               |
| Item 31: Arguments at home                                               | Stress of home life               | Stress of home life                 | Stress of home life               |
| <b>Stress of academic future uncertainty</b>                             |                                   |                                     |                                   |
| Item 47: admission by a good high school                                 | -                                 | -                                   | -                                 |
| Item 7: Concern about your future                                        | Stress of future uncertainty      | Stress of adult responsibility      | Stress of future uncertainty      |
| Item 10: Other relatives except your parents expecting too much from you | -                                 | -                                   | -                                 |
| Item 9: Keeping up with the school work                                  | Stress of future uncertainty      | Stress of future uncertainty        | Stress of school performance      |
| Item 12: Difficulty with some subjects                                   | Stress of school performance      | Stress of school performance        | Stress of school performance      |
| Item 46: Parents expecting too much from you                             | Stress of home life               | Stress of home life                 | Stress of home life               |
| Item 6: Teachers expecting too much from you                             | Stress of school performance      | Stress of school performance        | Stress of school performance      |
| Item 25: Not getting enough timely feedback on schoolwork                | Stress of teacher interaction     | Stress of school/leisure conflict   | Stress of teacher interaction     |
| <b>Stress of school/leisure conflict</b>                                 |                                   |                                     |                                   |
| Item 19: Not having enough time for fun                                  | Stress of school/leisure conflict | Stress of school/leisure conflict   | Stress of school/leisure conflict |
| Item 26: Not enough time for activities outside of school hours          | Stress of school/leisure conflict | Stress of school/leisure conflict   | Stress of school/leisure conflict |
| Item 23: Not getting enough time for leisure                             | Stress of school/leisure conflict | Stress of school/leisure conflict   | Stress of school/leisure conflict |
| Item 3: Getting up early in the morning to go to school                  | Stress of school attendance       | Stress of school attendance         | Stress of school attendance       |
| Item 24: Having too much homework                                        | Stress of school/leisure conflict | Stress of school/leisure conflict   | Stress of school/leisure conflict |
| Item 5: Having to study things you don't understand                      | Stress of school performance      | Stress of school performance        | Stress of school performance      |
| Item 14: Having to concentrate too long during school hours              | Stress of school performance      | Stress of school performance        | Stress of school performance      |
| <b>Stress of daily life</b>                                              |                                   |                                     |                                   |

|                                                                             |                                         |                                     |                                         |
|-----------------------------------------------------------------------------|-----------------------------------------|-------------------------------------|-----------------------------------------|
| Item 33: Compulsory school attendance                                       | Stress of school attendance             | Stress of school attendance         | Stress of school attendance             |
| Item 51: Not enough money to buy the things you need                        | Stress of financial pressure            | Stress of financial pressure        | Stress of financial pressure            |
| Item 36: Satisfaction with how you look                                     | Stress of peer pressure                 | Stress of teacher/adult interaction | Stress of peer pressure                 |
| Item 35: Living at home                                                     | Stress of home life                     | Stress of home life                 | Stress of home life                     |
| Item 38: Not enough money to buy the things you want                        | Stress of financial pressure            | Stress of financial pressure        | Stress of financial pressure            |
| Item 42: Abiding by petty rules at school                                   | Stress of teacher interaction           | Stress of school attendance         | Stress of teacher interaction           |
| Item 57: Getting along with your teachers                                   | Stress of teacher interaction           | Stress of teacher/adult interaction | Stress of teacher interaction           |
| <b>Stress of parental authority and emerging autonomy</b>                   |                                         |                                     |                                         |
| Item 2: Not being taken seriously by your parents                           | Stress of home life                     | Stress of home life                 | Stress of home life                     |
| Item 13: Abiding by petty rules at home                                     | Stress of home life                     | Stress of home life                 | Stress of home life                     |
| Item 1: Disagreements between you and your father                           | Stress of home life                     | Stress of home life                 | Stress of home life                     |
| Item 18: Disagreements between you and your teachers                        | Stress of teacher interaction           | Not loading                         | Stress of teacher interaction           |
| Item 11: Having to take on new familial responsibilities with growing older | Stress of emerging adult responsibility | Not loading                         | Stress of emerging adult responsibility |
| Item 21: Disagreements between you and your brothers and sisters            | Not included                            | Stress of home life                 | Not included                            |
| Item 8: Being hassled for not fitting in                                    | Stress of peer pressure                 | Stress of peer pressure             | Stress of peer pressure                 |
| <b>Not included</b>                                                         |                                         |                                     |                                         |
| Item 4: Little or no control over your life                                 | Stress of home life                     | Stress of school attendance         | Stress of home life                     |
| Item 15: Lack of school resources                                           | Not included                            | Not included                        | Not included                            |
| Item 16: Having to study things you are not interested in                   | Stress of school performance            | Stress of school performance        | Stress of school performance            |
| Item 17: Being ignored or rejected by the person you want to go out with    | Stress of romantic relationships        | Stress of peer pressure             | Stress of romantic relationships        |
| Item 20: putting pressure on yourself to meet your future goals             | Stress of future uncertainty            | Not included                        | Stress of future uncertainty            |
| Item 22: Taking extra classes outside school hours                          | -                                       | -                                   | -                                       |
| Item 29: Disagreements between your parents                                 | Stress of home life                     | Stress of home life                 | Stress of home life                     |
| Item 30: Changes in your physical appearance with growing up                | Stress of peer pressure                 | Stress of peer pressure             | Stress of peer pressure                 |
| Item 43: Pressure of study                                                  | Stress of school performance            | Stress of school performance        | Stress of school performance            |
| Item 50: Work interfering with social activities                            | Stress of emerging adult responsibility | Stress of school/leisure conflict   | Stress of emerging adult responsibility |
| Item 34: Having to make decisions about future work or education            | Stress of future uncertainty            | Stress of adult responsibility      | Stress of future uncertainty            |
| Item 39: Going to school                                                    | Stress of school attendance             | Stress of school attendance         | Stress of school attendance             |
| Item 54: Peers hassling you about the way you look                          | Stress of peer pressure                 | Stress of peer pressure             | Stress of peer pressure                 |

*Note.*

Not included: item was excluded from the factor structure.

- : item was replaced and different from the respective original item in the *ASQ*.



|         |        |      |      |             |
|---------|--------|------|------|-------------|
| 5       | Item37 | .699 | .156 |             |
| 6       | Item1  | .529 |      | .270        |
| 6       | Item2  | .569 |      | <b>.406</b> |
| 6       | Item8  | .625 |      | .230        |
| 6       | Item11 | .645 |      | .325        |
| 6       | Item13 | .635 |      | .359        |
| 6       | Item18 | .696 |      | .283        |
| 6       | Item21 | .653 |      | .230        |
| General | Item4  | .662 |      |             |
| General | Item15 | .605 |      |             |
| General | Item16 | .693 |      |             |
| General | Item17 | .690 |      |             |
| General | Item20 | .628 |      |             |
| General | Item22 | .696 |      |             |
| General | Item29 | .770 |      |             |
| General | Item30 | .714 |      |             |
| General | Item43 | .624 |      |             |
| General | Item50 | .794 |      |             |
| General | Item34 | .665 |      |             |
| General | Item39 | .675 |      |             |
| General | Item54 | .732 |      |             |

---

*Note.*

<sup>a</sup> Salient loadings ( $\geq .4$ ) are in bold.

---

Table S3

*Second-order hierarchical structure and variance components of the ASQ-CN*

| First-order scale                                  | Proportion of variance |       |                       |
|----------------------------------------------------|------------------------|-------|-----------------------|
|                                                    | Common                 | Error | Specific <sup>a</sup> |
| Stress of romantic relationships                   | .41                    | .14   | <b>.45</b>            |
| Stress of getting along with others                | .75                    | .10   | <b>.15</b>            |
| Stress of academic future uncertainty              | .73                    | .12   | <b>.15</b>            |
| Stress of school/leisure conflict                  | .67                    | .14   | <b>.19</b>            |
| Stress of daily life                               | .64                    | .14   | <b>.22</b>            |
| Stress of parental authority and emerging autonomy | .73                    | .18   | .09                   |

*Note.*

<sup>a</sup> Specific variance indicates the proportion of variance which is both reliable and unique to a particular scale, Specific variance is calculated by subtracting communality for a scale from its internal consistency index (posted in Table 1). Specific variance values that exceed error variance (where error variance = 1 - internal consistency) are considered significant and are bolded. The sum of row entries for variance components = 1.
